# Supplementary material for: Redox Activity of APE1 Mediates SASP Suppression in Senescent Fibroblasts
Source: Research Square preprint supplement (doi:10.21203/rs.3.rs-6841207/v1), 2025-06-11
Supplement: Supplementary file 1 [file 3e6f6af0fd4684af032ebe4e.docx]

| **Table 1** The primer sequences used in the study | | |
| --- | --- | --- |
| **Gene** | **Forward Sequences** | **Reverse Sequences** |
| ACTB | 5ʹ-tctcccaagtccacacagg-3ʹ | 5ʹ-ggcacgaaggctcatca-3ʹ |
| IL6 | 5ʹ-gtatgaacaacgatgatgcac-3ʹ | 5ʹ-ctccagaagaccagaggaaa-3ʹ |
| ΙL8 | 5ʹ-tgccaaggagtgctaaaga-3ʹ | 5ʹ-tggaaaggtttggagtatgtc-3ʹ |
| CCL5 | 5ʹ-atatggctcggacaccac-3ʹ | 5ʹ-gtgacaaacacgactgcaa-3ʹ |
| TNF-α | 5ʹ-cgctgaggtcaatctgc-3ʹ | 5ʹ-ggctgggtagagaatgga-3ʹ |
| IFN-β | 5ʹ-cacagccctctccatca-3ʹ | 5ʹ-tctccgtcatctccatagg-3ʹ |
